# Supplementary material for: Survival after bilateral risk-reducing mastectomy in healthy BRCA1 and BRCA2 mutation carriers
Source: Springer Nature journal article supplement (doi:10.1007/s10549-019-05345-2), 2019-07-13
Supplement: MOESM1 [file 16926910]

Online-only material accompanying manuscript entitled “Survival after bilateral risk-reducing mastectomy in healthy *BRCA1* and *BRCA2* mutation carriers”

Breast Cancer Research and Treatment

Corresponding author

Dr. Bernadette A.M. Heemskerk-Gerritsen

Erasmus MC Cancer Institute

Department of Medical Oncology

PO Box 5201

3008 AE Rotterdam

The Netherlands

Phone +31 10 7035484

[b.heemskerk-gerritsen@erasmusmc.nl](mailto:b.heemskerk-gerritsen@erasmusmc.nl)

Including:

- Table S1. *BRCA1*-associated breast cancer characteristics
- Table S2. Differences between *BRCA1/2* mutation carriers (combined) with known and unknown screening status in the surveillance group

Table S1. *BRCA1*-associated breast cancer characteristics

|                                                              | <b>BRRM</b>  | <b>Surveillance</b> | <b>P-value<sup>a</sup></b> |
|--------------------------------------------------------------|--------------|---------------------|----------------------------|
| <b>N</b>                                                     | 8 (3%)       | 268 (97%)           |                            |
| <b>Age at diagnosis, median (IQR)</b>                        | 45 (34 - 48) | 44 (35 - 50)        | 0.781                      |
| <b>Behavior, n/N (%)</b>                                     |              |                     |                            |
| <b>In situ</b>                                               | 0/7 (0%)     | 32/263 (12%)        | 0.326                      |
| <b>Invasive</b>                                              | 7/7 (100%)   | 231/263 (88%)       |                            |
| <b>Bloom &amp; Richardson differentiation grade, n/N (%)</b> |              |                     |                            |
| <b>I</b>                                                     | 0/6 (0%)     | 9/245 (4%)          | 0.753                      |
| <b>II</b>                                                    | 2/6 (33%)    | 55/245 (22%)        |                            |
| <b>III</b>                                                   | 4/6 (67%)    | 181/245 (74%)       |                            |
| <b>pT-status, n/N (%)</b>                                    |              |                     |                            |
| <b>0 (in situ)</b>                                           | 0/5 (0%)     | 32/248 (13%)        | 0.652                      |
| <b>1</b>                                                     | 4/5 (80%)    | 159/248 (64%)       |                            |
| <b>2</b>                                                     | 1/5 (20%)    | 57/248 (23%)        |                            |
| <b>pN-status, n/N (%)</b>                                    |              |                     |                            |
| <b>0</b>                                                     | 5/6 (83%)    | 202/242 (83%)       | 0.969                      |
| <b>1</b>                                                     | 1/6 (17%)    | 32/242 (13%)        |                            |
| <b>2</b>                                                     | 0/6 (0%)     | 6/242 (3%)          |                            |
| <b>3</b>                                                     | 0/6 (0%)     | 2/242 (1%)          |                            |
| <b>Positive ER-status<sup>b</sup>, n/N (%)</b>               | 2/6 (33%)    | 47/218 (22%)        | 0.491                      |
| <b>Positive PR-status<sup>b</sup>, n/N (%)</b>               | 1/6 (17%)    | 35/213 (16%)        | 0.988                      |
| <b>Positive Her2-status<sup>c</sup>, n/N (%)</b>             | 0/4 (0%)     | 10/166 (6%)         | 0.613                      |
| <b>Triple-negative<sup>d</sup>, n/N (%)</b>                  | 2/4 (50%)    | 126/160 (78%)       | 0.191                      |

Abbreviations: BRRM, bilateral risk-reducing mastectomy; IQR, interquartile range; n/N, number out of total number of women with non-missing data on the variable of interest; ER, estrogen receptor; PR, progesterone receptor.

<sup>a</sup>Differences between the BRRM and the surveillance group were tested by using Chi-square for categorical variables, and the two-sample Wilcoxon rank-sum (Mann-Whitney) test for continuous variables

<sup>b</sup>Hormone receptors were considered positive if staining was seen in  $\geq 10\%$  of the nuclei, according to the Dutch national guidelines for breast cancer treatment.

<sup>c</sup>Her2 receptor status was scored according to international guidelines. An equivocal immunohistochemical result (2+) was followed by fluorescence in situ hybridization.

<sup>d</sup>ER-negative, PR-negative and Her2-negative.

Table S2. Differences between *BRCA1/2* mutation carriers (combined) with known and unknown screening status in the surveillance group

|                                                              | Screening status     |                      | P-value <sup>a</sup> |
|--------------------------------------------------------------|----------------------|----------------------|----------------------|
|                                                              | Known                | Unknown              |                      |
| <b>N</b>                                                     | <b>865 (50%)</b>     | <b>864 (50%)</b>     |                      |
| Had screening <sup>b</sup> , n/N (%)                         | 761/865 (88%)        | -                    |                      |
| Screening modality <sup>b</sup>                              |                      |                      |                      |
| Mx and MRI, n/N (%)                                          | 537/761 (71%)        | -                    |                      |
| MRI only, n/N (%)                                            | 102/761 (13%)        | -                    |                      |
| Mx only, n/N (%)                                             | 74/761 (10%)         | -                    |                      |
| Unknown, n/N (%)                                             | 48/761 (6%)          | -                    |                      |
| <b>Breast cancer, n/N (%)</b>                                | <b>249/865 (29%)</b> | <b>163/864 (19%)</b> | <b>&lt;0.001</b>     |
| Age at diagnosis, median years (IQR)                         | 43 (35 - 50)         | 46 (38 - 53)         | 0.035                |
| Behavior, n/N (%)                                            |                      |                      |                      |
| In situ                                                      | 31/247 (13%)         | 37/159 (23%)         | 0.005                |
| Invasive                                                     | 216/247 (87%)        | 122/159 (77%)        |                      |
| <b>Bloom &amp; Richardson differentiation grade, n/N (%)</b> |                      |                      |                      |
| I                                                            | 14/230 (6%)          | 6/141 (4%)           | 0.875                |
| II                                                           | 76/230 (33%)         | 47/141 (33%)         |                      |
| III                                                          | 140/230 (61%)        | 88/141 (63%)         |                      |
| <b>pT-status, n/N (%)</b>                                    |                      |                      |                      |
| 0                                                            | 31/239 (13%)         | 37/145 (25%)         | 0.013                |
| 1                                                            | 157/239 (66%)        | 81/145 (56%)         |                      |
| 2                                                            | 49/239 (20%)         | 27/145 (19%)         |                      |
| 3                                                            | 2/239 (1%)           | 0/145 (0%)           |                      |
| <b>pN-status, n/N (%)</b>                                    |                      |                      |                      |
| 0                                                            | 189/231 (82%)        | 113/140 (81%)        | 0.412                |
| 1                                                            | 34/231 (15%)         | 23/140 (16%)         |                      |
| 2                                                            | 6/231 (2%)           | 1/140 (1%)           |                      |
| 3                                                            | 2/231 (1%)           | 3/140 (2%)           |                      |
| Positive ER-status <sup>c</sup> , n/N (%)                    | 80/210 (38%)         | 46/109 (42%)         | 0.477                |
| Positive PR-status <sup>c</sup> , n/N (%)                    | 54/208 (26%)         | 36/105 (34%)         | 0.124                |
| Positive Her2-status <sup>d</sup> , n/N (%)                  | 10/158 (6%)          | 8/84 (10%)           | 0.516                |
| Triple-negative <sup>e</sup> , n/N (%)                       | 97/156 (62%)         | 46/81 (57%)          | 0.421                |
| <b>Treatment primary breast cancer, n/N (%)</b>              |                      |                      |                      |
| Chemotherapy                                                 | 140/245 (57%)        | 80/162 (49%)         | 0.124                |
| Endocrine therapy                                            | 55/241 (23%)         | 36/149 (24%)         | 0.761                |
| Targeted therapy                                             | 8/241 (3%)           | 8/149 (5%)           | 0.321                |
| Radiotherapy                                                 | 64/241 (27%)         | 35/149 (23%)         | 0.499                |
| <b>Ovarian cancer, n/N (%)</b>                               | <b>21/865 (2%)</b>   | <b>28/864 (3%)</b>   | <b>0.308</b>         |
| <b>Death, n/N (%)</b>                                        | <b>34/865 (4%)</b>   | <b>47/864 (5%)</b>   | <b>0.138</b>         |
| Cause of death, n/N (%)                                      |                      |                      |                      |
| Breast cancer                                                | 19/865 (2.2%)        | 8/864 (0.9%)         | 0.033                |
| Ovarian cancer                                               | 7/865 (0.8%)         | 14/864 (1.6%)        | 0.124                |
| Other malignancy                                             | 8/865 (0.9%)         | 20/864 (2.3%)        | 0.022                |
| Not due to malignancy                                        | 0/865 (0%)           | 5/864 (0.8%)         | 0.008                |

Abbreviations: n/N, number out of total number of women with non-missing data on the variable of interest; Mx, mammography; MRI, magnetic resonance imaging; IQR, interquartile range; ER, estrogen receptor; PR, progesterone receptor.

<sup>a</sup> Differences between the groups were tested by using Chi-square for categorical variables, and the two-sample Wilcoxon rank-sum (Mann-Whitney) test for continuous variables

<sup>b</sup> Derived from self-reported data

<sup>c</sup> Hormone receptors were considered positive if staining was seen in  $\geq 10\%$  of the nuclei, according to the Dutch national guidelines for breast cancer treatment.

<sup>d</sup> Her2 receptor status was scored according to international guidelines. An equivocal immunohistochemical result (2+) was followed by fluorescence in situ hybridization.

<sup>e</sup> ER-negative, PR-negative and Her2-negative.
